# Supplementary figures and images for: Expanding the ataxia with oculomotor apraxia type 4 phenotype
Source: PubMed Central journal article supplement — Neurol Genet. 2016 Jan 21;2(1):e49. doi: 10.1212/NXG.0000000000000049 (PMC4817910; doi:10.1212/nxg.0000000000000049), 2016-01-21

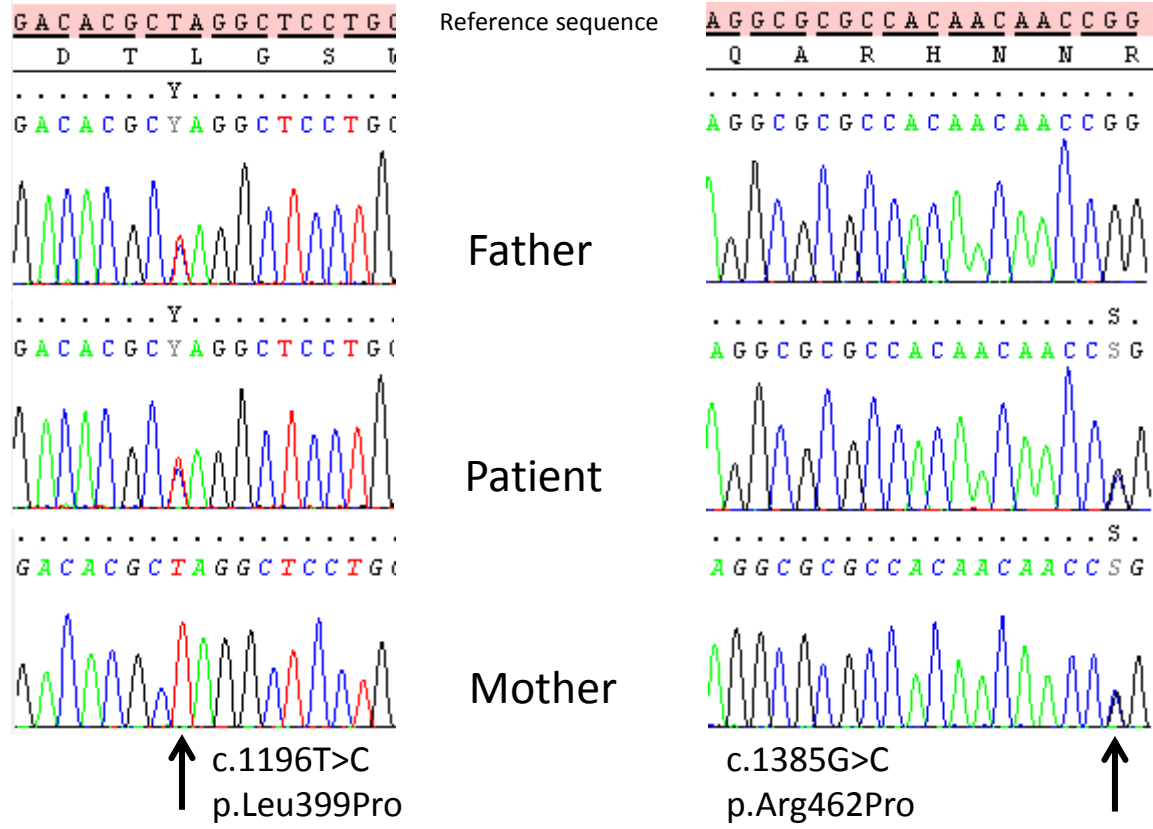

Figure e-1: Electropherograms of the two detected PNKP sequence variants.

Supplement: supp_2.1.e49_Figure_e-1.pdf [file supp_2.1.e49_Figure_e-1.pdf]
